# Supplementary material
Source: PubMed Central journal article supplement (PMC5037903)
Supplement: NIHMS816613-supplement-2.pdf [file NIHMS816613-supplement-2.pdf]

Table 1

Typical Fatty Acid Content of AIN-93M and  
D14122201

|                              | D10012M        | D14122201           |
|------------------------------|----------------|---------------------|
|                              | <i>AIN-93M</i> | <i>Menhaden/SOY</i> |
| Ingredient (g)               |                | gm                  |
| Corn Oil                     |                |                     |
| Menhaden Oil, ARBP-F         |                | 30                  |
| Soybean Oil, USP             | 40             | 10                  |
| Total                        | 40             | 40                  |
| C2, Acetic                   | 0.0            | 0.0                 |
| C4, Butyric                  | 0.0            | 0.0                 |
| C6, Caproic                  | 0.0            | 0.0                 |
| C8, Caprylic                 | 0.0            | 0.0                 |
| C10, Capric                  | 0.0            | 0.0                 |
| C12, Lauric                  | 0.0            | 0.0                 |
| C14, Myristic                | 0.0            | 2.1                 |
| C14:1, Myristoleic           | 0.0            | 0.0                 |
| C15:0                        | 0.0            | 0.2                 |
| C16, Palmitic                | 4.2            | 5.5                 |
| C16:1, Palmitoleic           | 0.0            | 2.9                 |
| C16:2                        | 0.0            | 0.5                 |
| C16:3                        | 0.0            | 0.5                 |
| C16:4                        | 0.0            | 0.5                 |
| C17:0                        | 0.0            | 0.2                 |
| C17:1, n-9                   | 0.0            | 0.1                 |
| C18, Stearic                 | 1.5            | 1.1                 |
| C18:1, Oleic, n-9            | 9.7            | 5.3                 |
| C18:1, Vaccenic, n-7         | 0.0            | 0.0                 |
| C18:2, Linoleic, n-6         | 21.4           | 5.9                 |
| C18:3, gamma-Linolenic, n-6  | 0.0            | 0.0                 |
| C18:3, alpha-Linolenic, n-3  | 3.1            | 1.2                 |
| C18:4, Stearidonic, n-3      | 0.0            | 0.9                 |
| C20, Arachidic               | 0.0            | 0.1                 |
| C20:1, n-9                   | 0.0            | 0.4                 |
| C20:2, Eicosadienoic, n-6    | 0.0            | 0.1                 |
| C20:3, n-6                   | 0.0            | 0.1                 |
| C20:3, n-3                   | 0.0            | 0.0                 |
| C20:4, Arachidonic, n-6      | 0.0            | 0.6                 |
| C20:4, n-3                   | 0.0            | 0.0                 |
| C20:5, Eicosapentaenoic, n-3 | 0.0            | 4.2                 |
| C21:0                        | 0.0            | 0.0                 |
| C21:5, n-3                   | 0.0            | 0.2                 |
| C22, Behenic                 | 0.0            | 0.0                 |
| C22:1, Erucic                | 0.0            | 0.1                 |
| C22:4, Clupanodonic, n-6     | 0.0            | 0.1                 |
| C22:5, n-3                   | 0.0            | 0.8                 |
| C22:5, n-6                   | 0.0            | 0.0                 |
| C22:6, Docosahexaenoic, n-3  | 0.0            | 3.1                 |
| C24, Lignoceric              | 0.0            | 0.2                 |
| C24:1                        | 0.0            | 0.1                 |
| Total                        | 39.9           | 36.9                |
| Saturated (g)                | 5.7            | 9.3                 |
| Monounsaturated (g)          | 9.7            | 8.9                 |
| Polyunsaturated (g)          | 24.5           | 18.7                |
| Saturated (%)                | 14.2           | 25.2                |
| Monounsaturated (%)          | 24.3           | 24.1                |
| Polyunsaturated (%)          | 61.4           | 50.7                |
| Total Omega-6 (g)            | 21.4           | 6.8                 |
| Total Omega-6 (%)            | 53.6           | 18.4                |
| Total Omega-3 (g)            | 3.1            | 10.6                |
| Total Omega-3 (%)            | 7.8            | 28.6                |
| n6 : n3 Ratio                | 6.9            | 0.6                 |

## D10012M and D14122201

AIN-93M Mature Rodent Diet and Same With Mostly Menhaden Oil

| Product #                   | D10012M     |             | D14122201             |             |
|-----------------------------|-------------|-------------|-----------------------|-------------|
|                             | gm%         | kcal%       | <i>Menhaden / SOY</i> |             |
|                             | gm%         | kcal%       | gm%                   | kcal%       |
| Protein                     | 14          | 15          | 14                    | 15          |
| Carbohydrate                | 73          | 76          | 73                    | 76          |
| Fat                         | 4           | 9           | 4                     | 9           |
| Total                       |             | 100         |                       | 100         |
| kcal/gm                     | 3.8         |             | 3.8                   |             |
|                             |             |             |                       |             |
| Ingredient                  | gm          | kcal        | gm                    | kcal        |
| Casein                      | 140         | 560         | 140                   | 560         |
| L-Cystine                   | 1.8         | 7.2         | 1.8                   | 7.2         |
|                             |             |             |                       |             |
| Corn Starch                 | 495.692     | 1982.768    | 495.692               | 1982.8      |
| Maltodextrin 10             | 125         | 500         | 125                   | 500         |
| Sucrose                     | 100         | 400         | 100                   | 400         |
|                             |             |             |                       |             |
| Cellulose, BW200            | 50          | 0           | 50                    | 0           |
|                             |             |             |                       |             |
| Menhaden Oil (200 ppm tBHQ) | 0           | 0           | 30                    | 270         |
| Soybean Oil                 | 40          | 360         | 10                    | 90          |
| Corn Oil                    | 0           | 0           | 0                     | 0           |
| t-Butylhydroquinone         | 0.008       | 0           | 0.002                 | 0           |
|                             |             |             |                       |             |
| Mineral Mix S10022M         | 35          | 0           | 35                    | 0           |
|                             |             |             |                       |             |
| Vitamin Mix V10037          | 10          | 40          | 10                    | 40          |
| Choline Bitartrate          | 2.5         | 0           | 2.5                   | 0           |
|                             |             |             |                       |             |
| FD&C Red Dye #40            | 0           | 0           | 0.05                  | 0           |
|                             |             |             |                       |             |
| <b>Total</b>                | <b>1000</b> | <b>3850</b> | <b>1000.044</b>       | <b>3850</b> |
|                             |             |             |                       |             |
| tBHQ (gm)                   | 0.008       |             | 0.008                 |             |
